# Supplementary material
Source: PubMed Central journal article supplement (PMC3028727)
Supplement: supp_77_3_911__2.pdf [file supp_77_3_911__2.pdf]

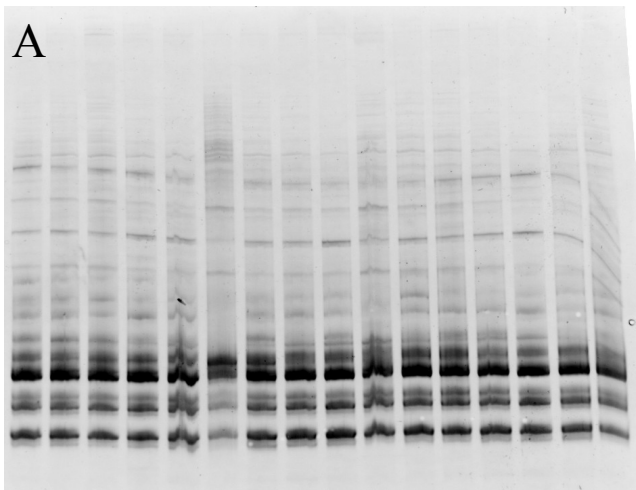

1■ 2□ 3○ 4● 5● 6○ 7□ 8■ 9■ 10□ 11○ 12● 13● 14○ 15□ 16■

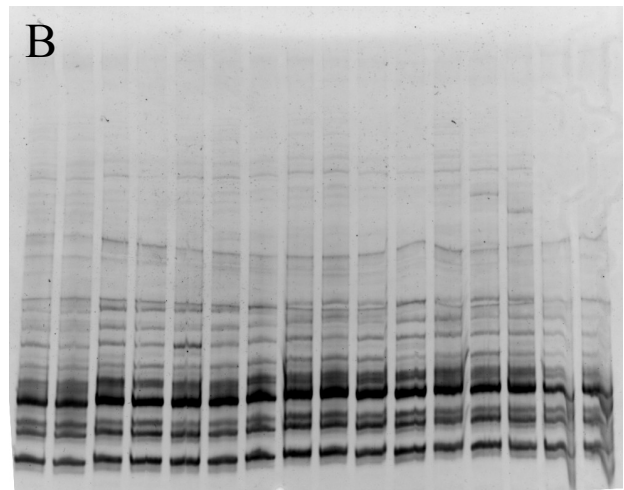

1■ 2□ 3○ 4● 5● 6○ 7□ 8■ 9■ 10□ 11○ 12● 13● 14○ 15□ 16■

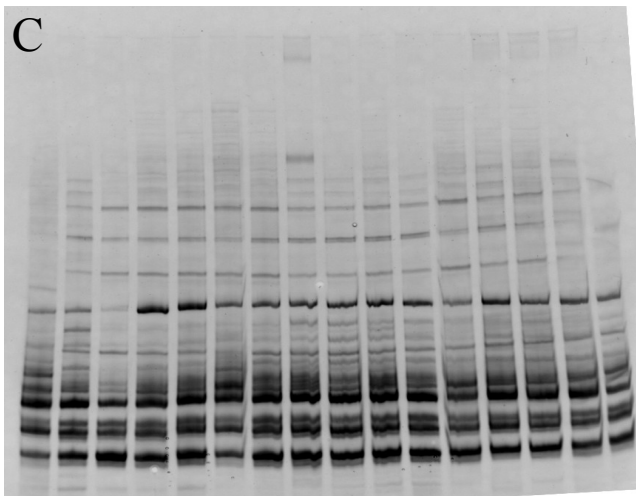

1■ 2□ 3○ 4● 5● 6○ 7□ 8■ 9■ 10□ 11○ 12● 13● 14○ 15□ 16■

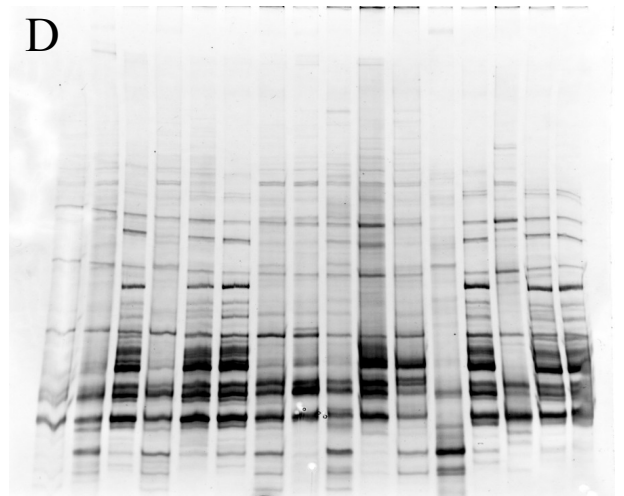

1■ 2□ 3○ 4● 5● 6○ 7□ 8■ 9■ 10□ 11○ 12● 13● 14○ 15□ 16■

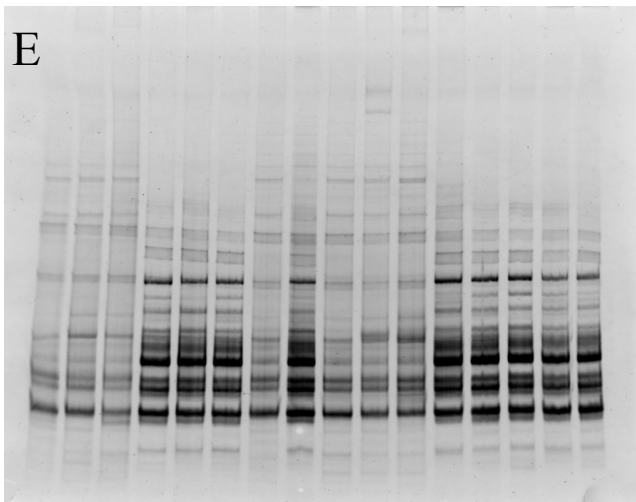

1■ 2□ 3○ 4● 5● 6○ 7□ 8■ 9■ 10□ 11○ 12● 13● 14○ 15□ 16■

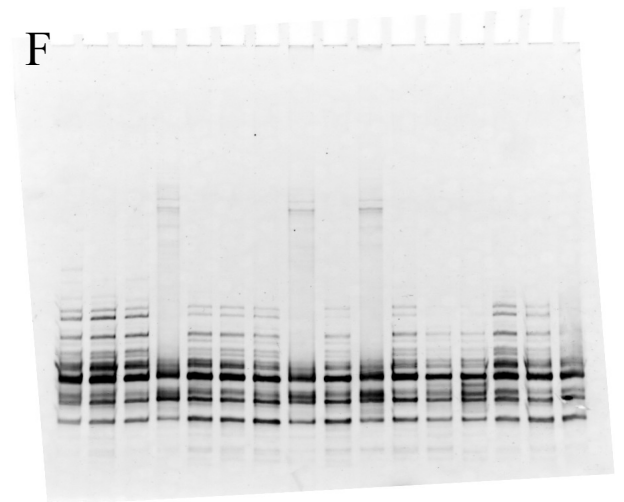

1■ 2□ 3○ 4● 5● 6○ 7□ 8■ 9■ 10□ 11○ 12● 13● 14○ 15□ 16■

**S2 DGGE profiles of the 16S rRNA gene.** For all images numbers relate to plot numbers in the field. Symbols indicate treatments; ● = orgFM conCP, □ = conFM conCP, ○ = conFM orgCP, ■ = orgFM conCP. A = March after beans. B = June after beans. C = September after beans. D = March after barley. E = June after barley. F = September after barley.
